# Supplementary material
Source: Springer Nature journal article supplement (https://www.springermedizin.de/resource/supplementary/40164_2013_65_MOESM1_ESM.pdf/9687108)

# Ingram *et al.* Additional File 1:

## Expression profiles for ABC transporters of particular interest, by molecular medulloblastoma subtype

Probeset expression profiles in public dataset NCBI GEO GSE10327 (62 Medulloblastoma Cases by Subtype). X-axis scale = Affymetrix data signal strength value. Note probesets for multiple transcripts are present for some genes.

Group names are as in Kool *et al.*, 2008. (Group A = WNT associated, Group B = SHH associated, while Group C + Group D = Group 4 and Group E = Group 3 in consensus nomenclature of Taylor *et al.* 2012)

**ABCA1** Probeset 203504\_s\_at discriminates group A from BCDE with an Adj. p-value <0.0001 and BE from ACD with an Adj. p-value <0.0001  
 Probeset 203505\_at discriminates group A from BCDE with an Adj. p-value <0.0001 and BE from ACD with an Adj. p-value <0.001

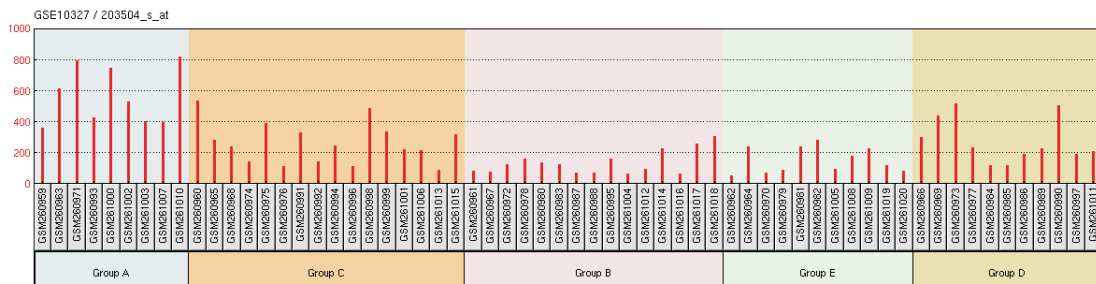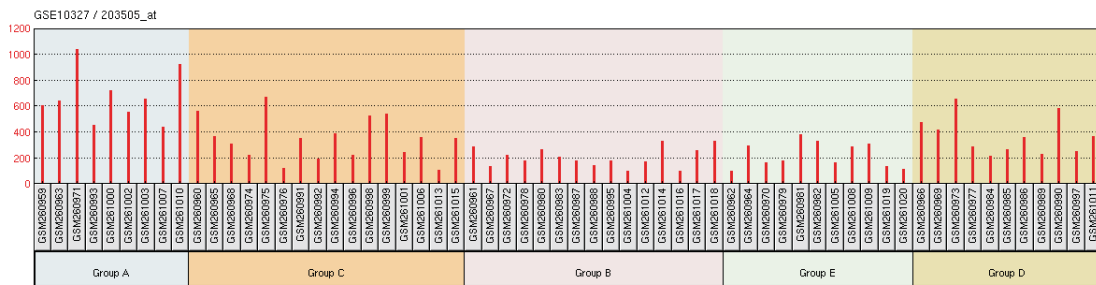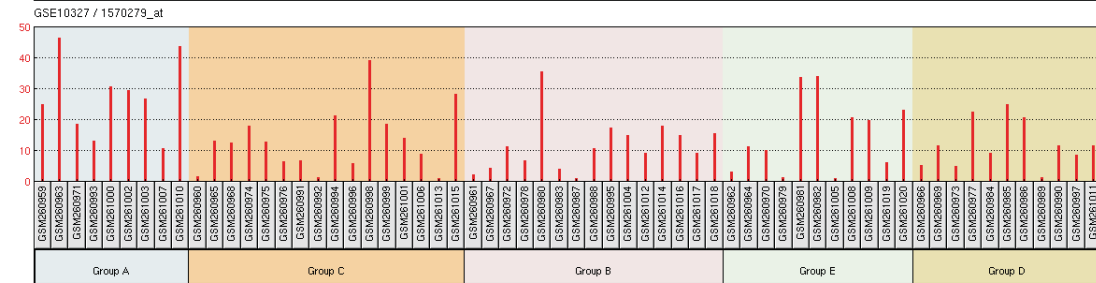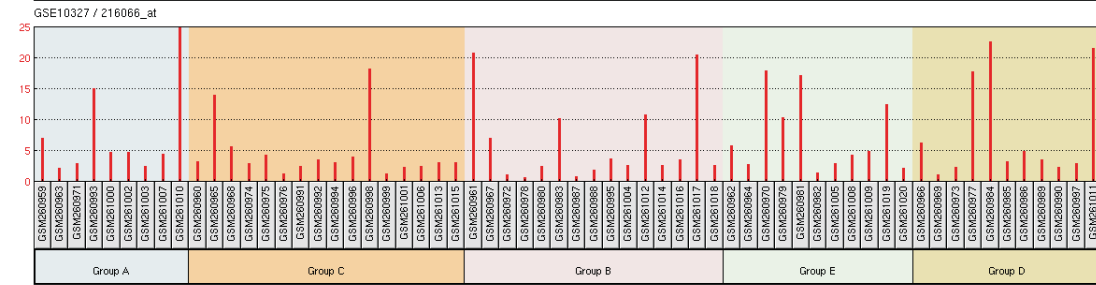

• value

## ABCG2

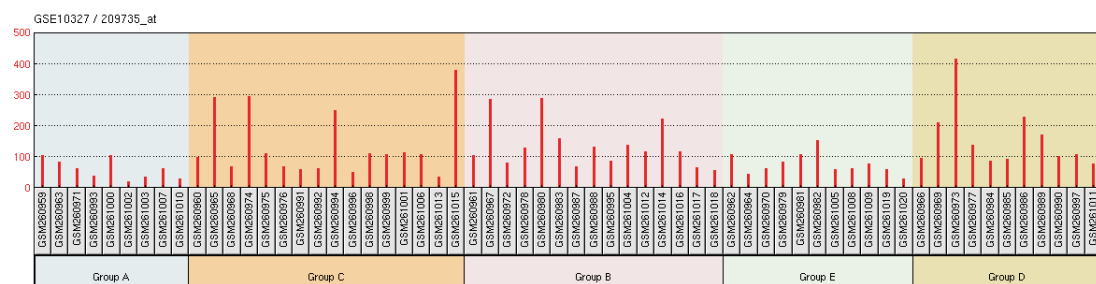

• value

### ABCB1

Probeset 209993\_at discriminates group A from BCDE with an Adj. p-value <0.001 and AE from BCD with an Adj. p-value <0.0001

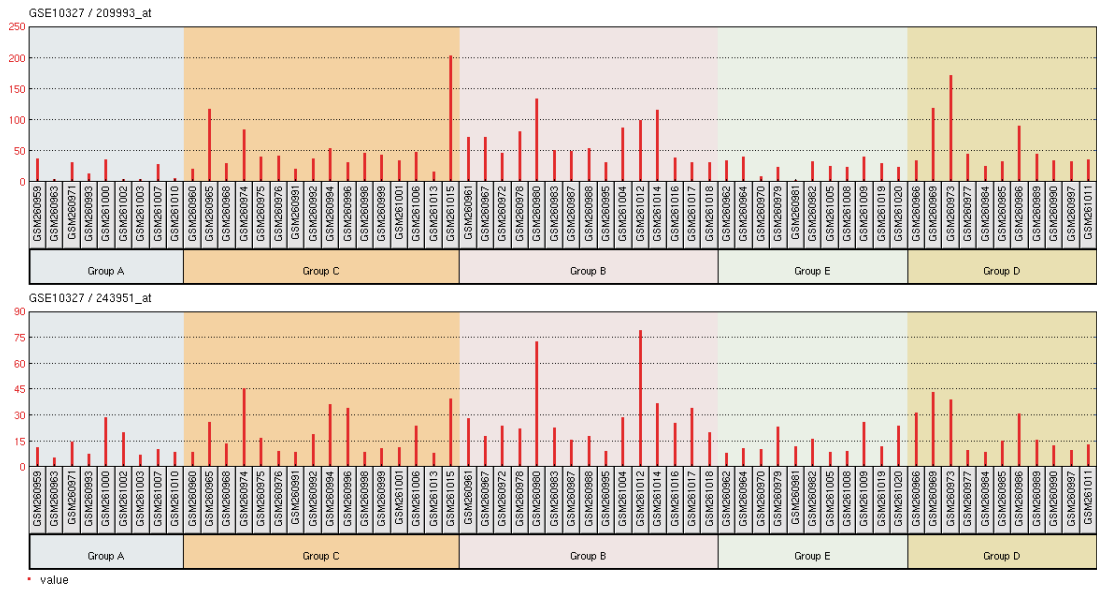

### ABCC1

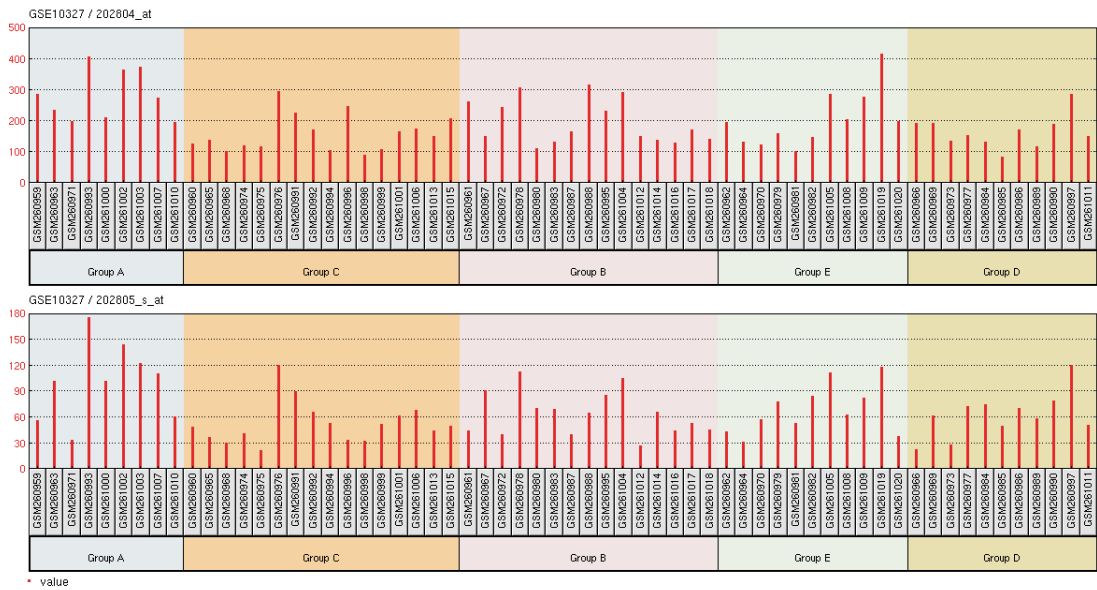

### ABCC2

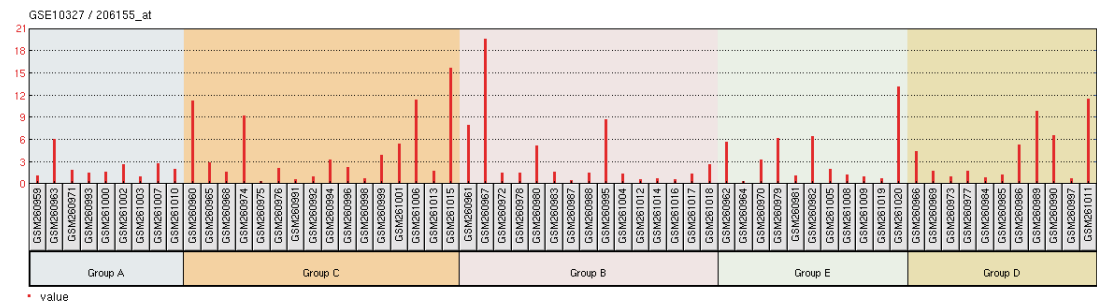

Supplement: MOESM1 [file 9687108]
